# Supplementary material for: Synthesis and self-assembly of cytidine- and guanosine-based copolymers
Source: Royal Society of Chemistry journal article supplement (doi:10.1039/d2py00615d), 2022-01-01
Supplement: d2py00615d1.pdf [file d2py00615d1.pdf]

## Synthesis and self-assembly of cytidine- and guanosine-based copolymers

### Supporting Information

Sany Chea<sup>a,b</sup>, Kristin Schade<sup>a</sup>, Stefan Reinicke<sup>a</sup>, Regina Bleul<sup>c</sup> and Ruben R. Rosencrantz<sup>\*,a</sup>

<sup>a</sup>Fraunhofer Institute for Applied Polymer Research IAP, Biofunctionalized Materials and (Glyco)Biotechnology, Geiselbergstr. 69, 14476 Potsdam, Germany

<sup>b</sup>University Potsdam, Chair of Polymer Materials and Polymer Technologies, Institute of Chemistry, Karl- Liebknecht- Str. 24-25, 14476 Potsdam, Germany

<sup>c</sup>Fraunhofer Institute for Microengineering and Microsystems IMM, Nanomaterials for Cancer Therapy, Carl-Zeiss-Str. 18-20, 55129 Mainz, Germany

|                                                                                                                                                                                                  |    |
|--------------------------------------------------------------------------------------------------------------------------------------------------------------------------------------------------|----|
| <b>Calculation methods</b> .....                                                                                                                                                                 | 3  |
| <b>Table 1.</b> Analytical data of pHPMA <b>10</b> .....                                                                                                                                         | 4  |
| <b>Figure 1.</b> a) UV-Vis spectrum of pHPMA <b>10</b> at different concentrations and b) linear fit of absorbance maximum to concentration.....                                                 | 4  |
| <b>Figure 2.</b> <sup>1</sup> H NMR spectrum of HPMA <b>10</b> in D <sub>2</sub> O.....                                                                                                          | 4  |
| <b>Figure 3.</b> <sup>1</sup> H NMR spectrum of iC-COOH <b>3</b> in D <sub>2</sub> O.....                                                                                                        | 5  |
| <b>Figure 4.</b> <sup>1</sup> H NMR spectrum of iG-COOH <b>4</b> in D <sub>2</sub> O.....                                                                                                        | 5  |
| <b>Figure 5.</b> <sup>1</sup> H NMR spectrum of monomer iCPMA <b>1</b> in D <sub>2</sub> O.....                                                                                                  | 5  |
| <b>Figure 6.</b> <sup>1</sup> H NMR spectrum of monomer iCPMA <b>1</b> in DMSO-d <sub>6</sub> .....                                                                                              | 6  |
| <b>Figure 7.</b> <sup>13</sup> C NMR spectrum of monomer iCPMA <b>1</b> in D <sub>2</sub> O + DMSO-d <sub>6</sub> .....                                                                          | 6  |
| <b>Figure 8.</b> <sup>1</sup> H NMR spectrum of monomer iGPMA <b>2</b> in D <sub>2</sub> O.....                                                                                                  | 6  |
| <b>Figure 9.</b> <sup>1</sup> H NMR spectrum of monomer iGPMA <b>2</b> in DMSO-d <sub>6</sub> .....                                                                                              | 7  |
| <b>Figure 10.</b> <sup>13</sup> C NMR spectrum of monomer iGPMA <b>2</b> in D <sub>2</sub> O + DMSO-d <sub>6</sub> .....                                                                         | 7  |
| <b>Figure 11.</b> <sup>1</sup> H NMR spectrum of homopolymer piCPMA <b>5</b> in DMSO-d <sub>6</sub> .....                                                                                        | 7  |
| <b>Figure 12.</b> <sup>1</sup> H NMR spectrum of deprotected homopolymer pCPMA <b>7</b> in DMSO-d <sub>6</sub> .....                                                                             | 8  |
| <b>Figure 13.</b> <sup>1</sup> H NMR spectrum of homopolymer piGPMA <b>6</b> in DMSO-d <sub>6</sub> .....                                                                                        | 8  |
| <b>Figure 14.</b> <sup>1</sup> H NMR spectrum of deprotected homopolymer pGPMA <b>8</b> in DMSO-d <sub>6</sub> .....                                                                             | 8  |
| <b>Figure 15.</b> <sup>1</sup> H NMR spectrum of pHPMA <b>9</b> in DMSO-d <sub>6</sub> .....                                                                                                     | 9  |
| <b>Figure 16.</b> <sup>1</sup> H NMR spectrum of blockcopolymer pHPMA- <i>b</i> -piCPMA <b>11</b> in DMSO-d <sub>6</sub> .....                                                                   | 9  |
| <b>Figure 17.</b> <sup>1</sup> H NMR spectrum of deprotected blockcopolymer pHPMA- <i>b</i> -CPMA <b>13</b> in DMSO-d <sub>6</sub> .....                                                         | 9  |
| <b>Figure 18.</b> <sup>1</sup> H NMR of blockcopolymer pHPMA- <i>b</i> -piGPMA <b>12</b> in DMSO-d <sub>6</sub> .....                                                                            | 10 |
| <b>Figure 19.</b> <sup>1</sup> H NMR spectrum of deprotected blockcopolymer pHPMA- <i>b</i> -pGPMA <b>14</b> in DMSO-d <sub>6</sub> .....                                                        | 10 |
| <b>Figure 20.</b> SEC analysis of piCPMA <b>5</b> (orange) and piGPMA <b>6</b> (blue) synthesized in DMF/H <sub>2</sub> O (straight) or 1,4-dioxane/H <sub>2</sub> O (dashed), respectively..... | 11 |
| <b>Figure 21.</b> SEC analysis of pHPMA <b>9</b> .....                                                                                                                                           | 12 |
| <b>Figure 22.</b> SEC analysis of a) pHPMA- <i>b</i> -piCPMA <b>11</b> and b) pHPMA- <i>b</i> -piGPMA <b>12</b> .....                                                                            | 12 |

**Figure 23.** AFM images of (a) pHPMA-b-pCPMA **13**, (b) pHPMA-b-pGPMA **14**, (c) mixture of **13** and **14** before heating and (d) mixture of **13** and **14** after heating. ....12

## Calculation methods

Monomer conversion was calculated following eq. 1 from the crude reaction mixture.  $\int_{H(\text{polymer})}$  equals the integration of the polymer backbone peak,  $\int_{H(\text{monomer})}$  the peak integration of the vinyl proton of the monomer.

$$\text{conversion} = \frac{\int_{H(\text{polymer})}}{\int_{H(\text{monomer})} + \int_{H(\text{polymer})}} \times 100 \% \quad (1)$$

The calculation of the theoretical molecular weight ( $M_{n, \text{theory, NMR}}$ ) is based on the conversion using eq. 2:

$$M_{n, \text{theory, NMR}} = \left( \frac{c_{\text{monomer}}}{c_{\text{CTA}}} \times \text{conversion} \times M_{\text{monomer}} \right) + M_{\text{CTA}} \quad (2)$$

where  $c_{\text{monomer}}$  and  $c_{\text{CTA}}$  are the initial concentrations of monomer and CTA.  $M_{\text{monomer}}$  and  $M_{\text{CTA}}$  indicate the molecular masses of monomer and CTA. "Livingness" was determined with following eq. 3:

$$L = \frac{c_{\text{CTA}}}{c_{\text{CTA}} + 2fc_i(1 - e^{-k_d t})\left(1 - \frac{f_c}{2}\right)} \times 100 \quad (3)$$

where  $c_{\text{CTA}}$  and  $c_i$  are the initial concentrations of CTA and initiator. The expression "2" refers to the formation of two primary radicals with a certain efficiency  $f$  from one initiator molecule. The expression "2" refers to the formation of two primary radicals from one initiator molecule with a certain efficiency  $f$ , which is typically 0.5 for diazo-initiators. The resulting chain number at radical termination is given as "1- $f_c/2$ ", where  $f_c$  is the coupling factor.  $k_d$  describes the decomposition coefficient of the initiator, while  $t$  is the reaction time.

$M_{n, \text{UV-Vis}}$  was determined using a Specord 210 spectrophotometer. by using Beer-Lambert eq. 4:

$$A = \frac{\varepsilon d c_{\text{mass}}}{M_{n, \text{UV-Vis}}} \quad (4)$$

where  $A$  is the absorption,  $\varepsilon$  the extinction coefficient,  $d$  the optical path length and  $c_{\text{mass}}$  the concentration.  $\frac{\varepsilon d}{M_{n, \text{UV-Vis}}}$  represents the slope, which results in the calculation of  $M_{n, \text{UV-Vis}}$  with the following eq. 5:

$$M_{n, \text{UV-Vis}} = \frac{\varepsilon \times d}{\text{slope}} \quad (5)$$

The average hydrodynamic radius and therefore the diameter of the formed aggregates were derived from the Stokes-Einstein eq. 6:

$$r = k_B T / 6\pi\eta D \quad (6)$$

where  $k_B$  is the Boltzmann's constant,  $T$  the absolute temperature,  $\eta$  the dynamic viscosity and  $D$  the diffusion coefficient.

**Table 1.** Analytical data of pHPMA **10**.

| Monomer   | Conversion | Polymer  | $M_{n, \text{theory, NMR}}$ | $M_{n, \text{NMR}}$   | $M_{n, \text{UV-Vis}}$ | $M_{n, \text{SEC}}^a$ | PDI  |
|-----------|------------|----------|-----------------------------|-----------------------|------------------------|-----------------------|------|
| <b>10</b> | 75 %       | <b>9</b> | 7.8 kDa                     | 38.7 kDa<br>(DP: 267) | 38.2 kDa<br>(DP: 263)  | 9.1 kDa               | 1.66 |

<sup>a</sup>DMF, PMMA standard.

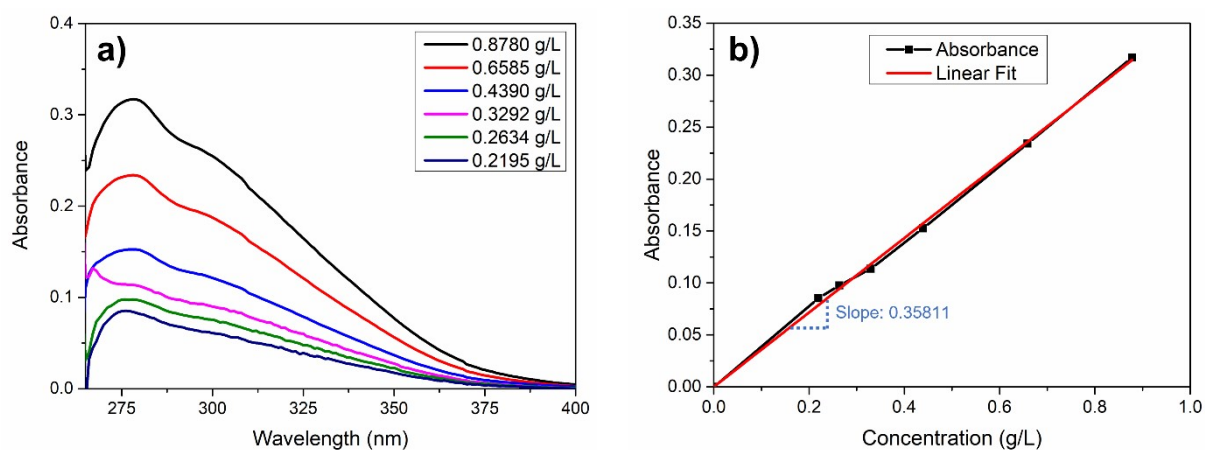

**Figure 1.** a) UV-Vis spectrum of pHPMA **10** at different concentrations and b) linear fit of absorbance maximum to concentration.

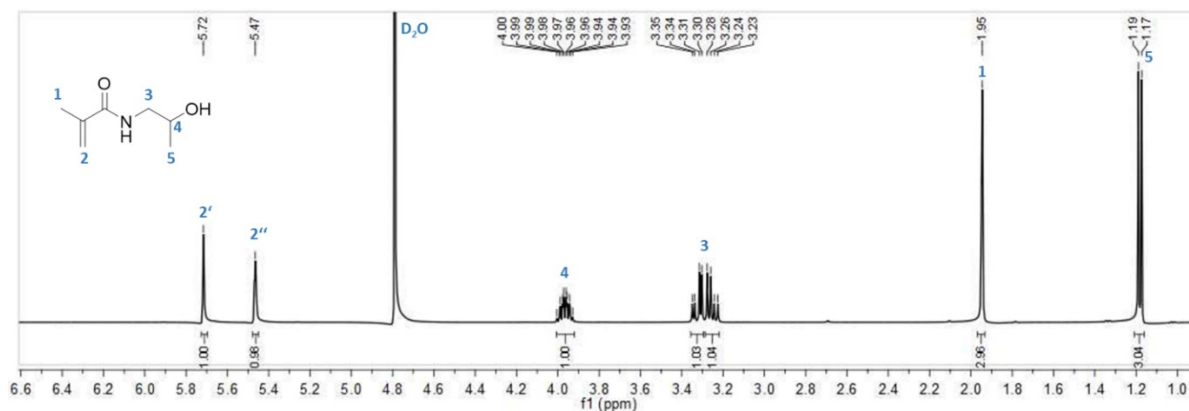

**Figure 2.** <sup>1</sup>H NMR spectrum of HPMA **10** in D<sub>2</sub>O.

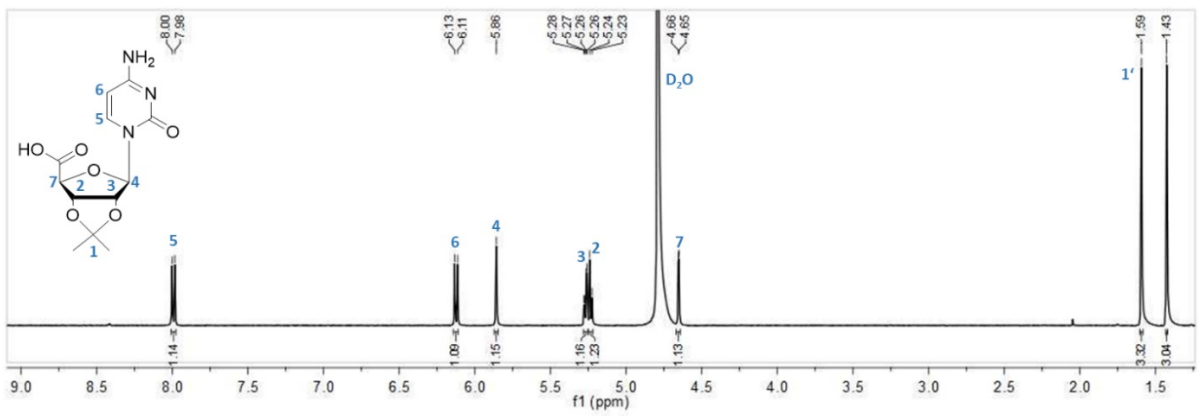

Figure 3.  $^1\text{H}$  NMR spectrum of *iC*-COOH **3** in  $\text{D}_2\text{O}$ .

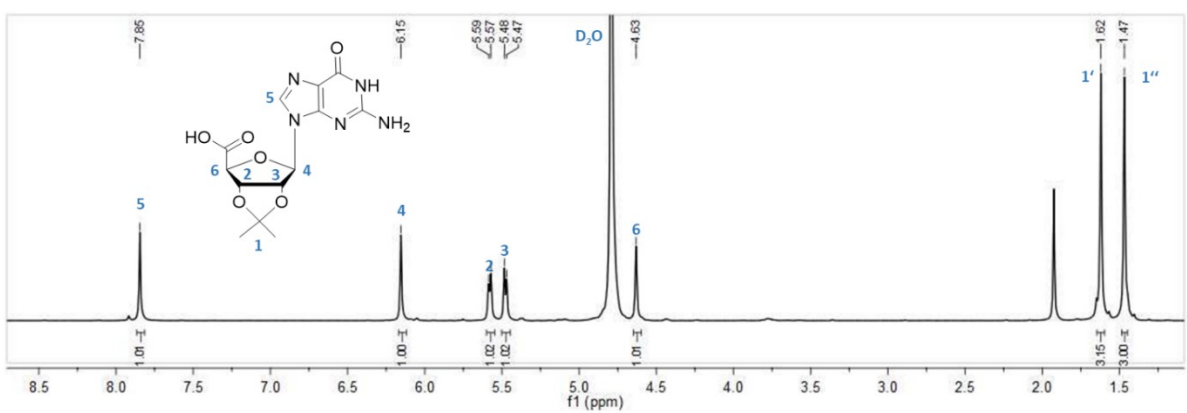

Figure 4.  $^1\text{H}$  NMR spectrum of *iG*-COOH **4** in  $\text{D}_2\text{O}$ .

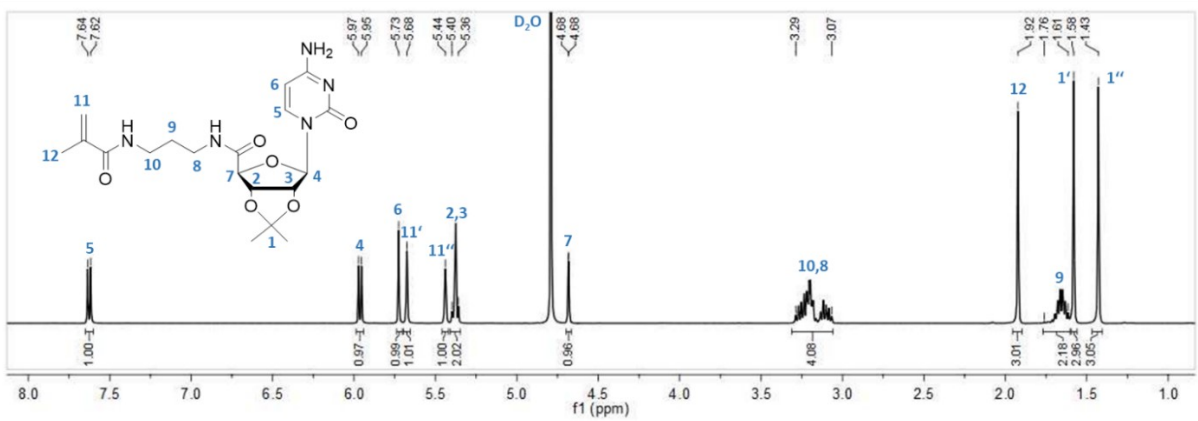

Figure 5.  $^1\text{H}$  NMR spectrum of monomer *iCPMA* **1** in  $\text{D}_2\text{O}$ .

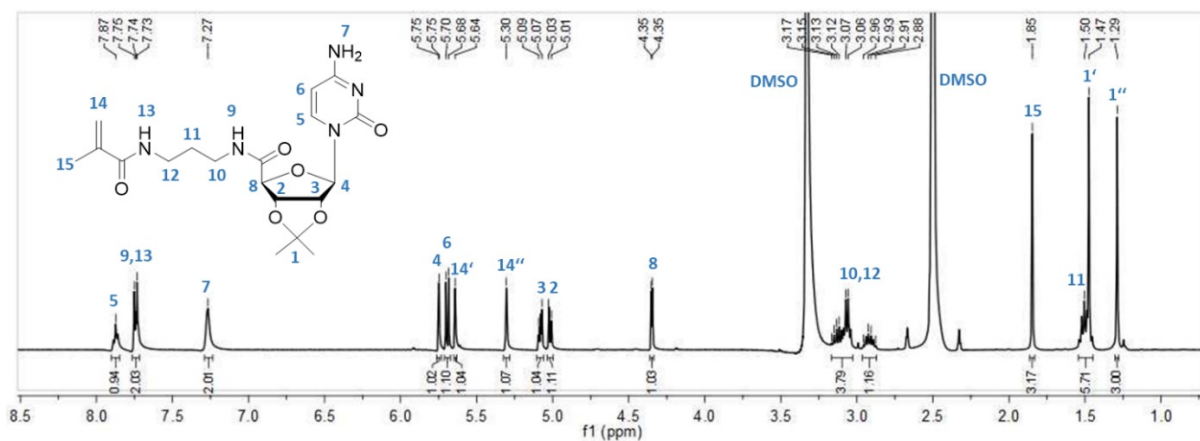

Figure 6.  $^1\text{H}$  NMR spectrum of monomer iCPMA **1** in  $\text{DMSO-d}_6$ .

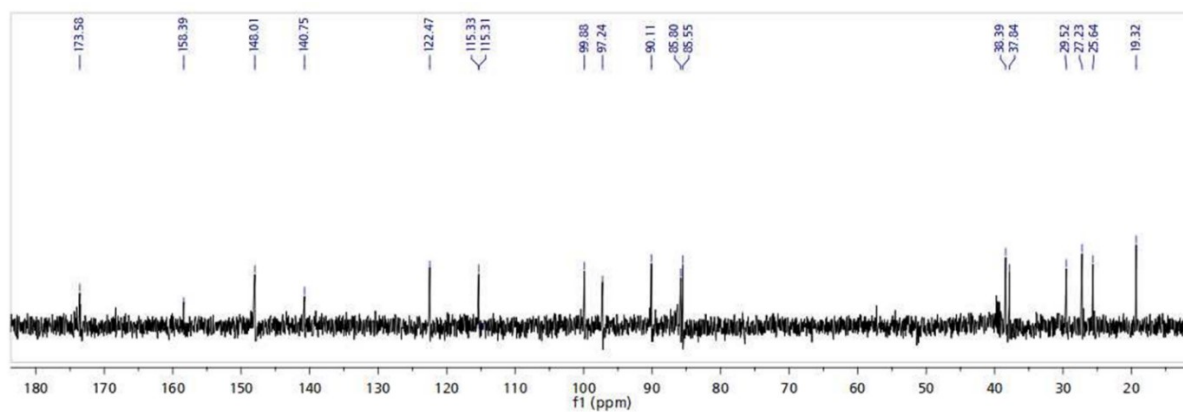

Figure 7.  $^{13}\text{C}$  NMR spectrum of monomer iCPMA **1** in  $\text{D}_2\text{O} + \text{DMSO-d}_6$ .

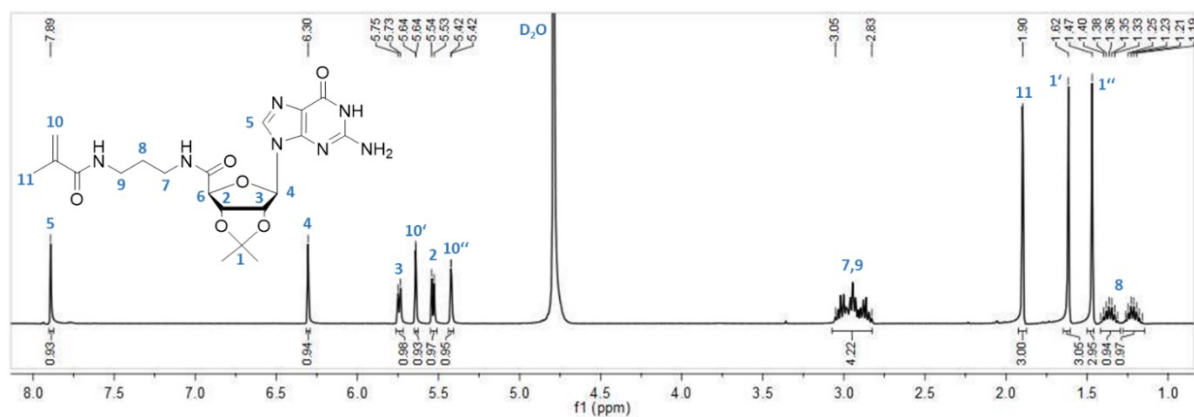

Figure 8.  $^1\text{H}$  NMR spectrum of monomer iGPMA **2** in  $\text{D}_2\text{O}$ .

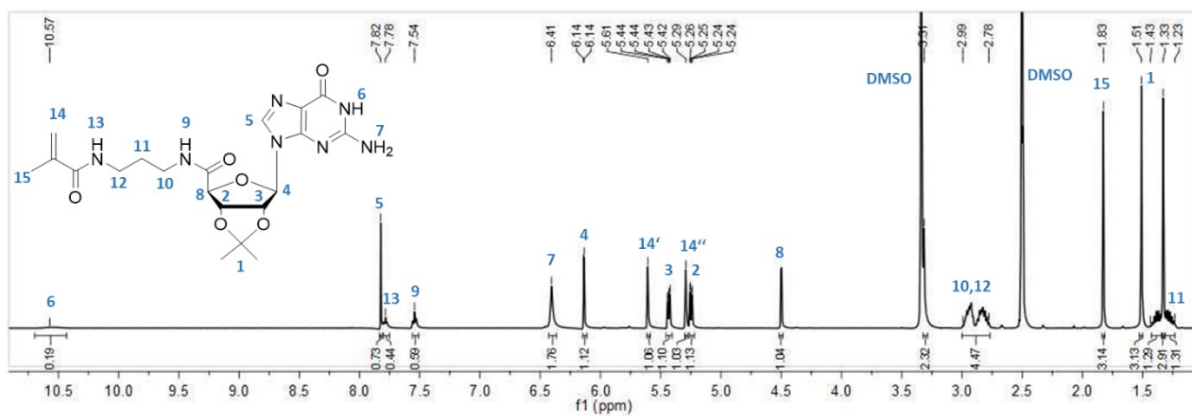

Figure 9.  $^1\text{H}$  NMR spectrum of monomer iGPMa 2 in  $\text{DMSO-d}_6$ .

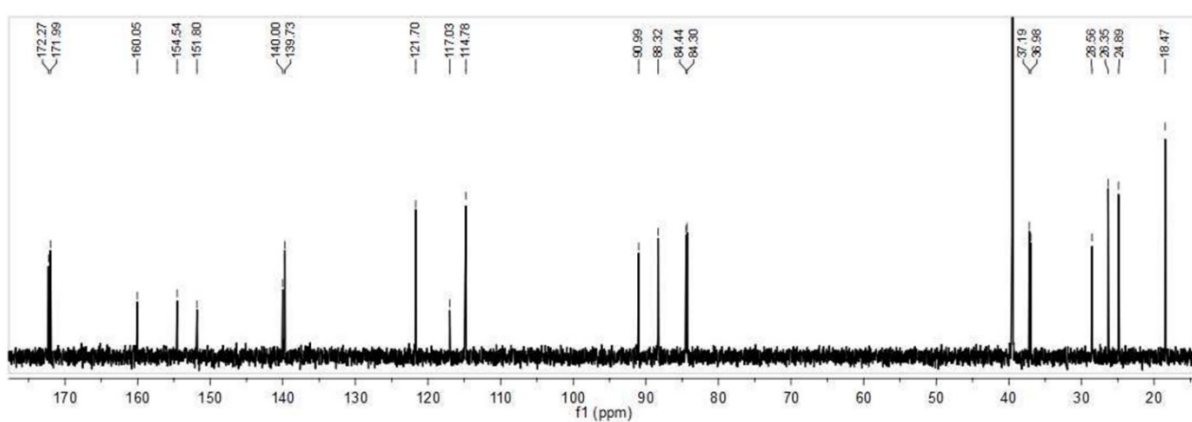

Figure 10.  $^{13}\text{C}$  NMR spectrum of monomer iGPMa 2 in  $\text{D}_2\text{O} + \text{DMSO-d}_6$ .

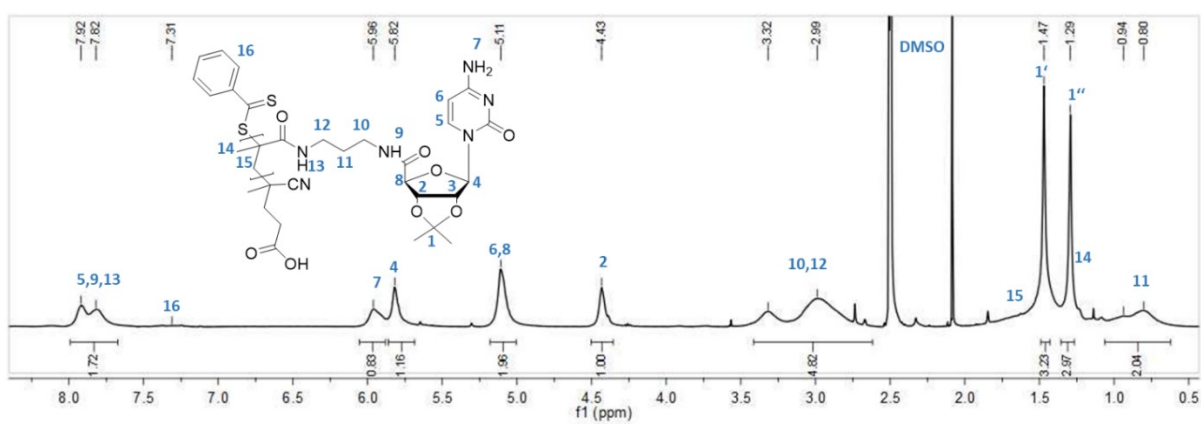

Figure 11.  $^1\text{H}$  NMR spectrum of homopolymer piCpMA 5 in  $\text{DMSO-d}_6$ .

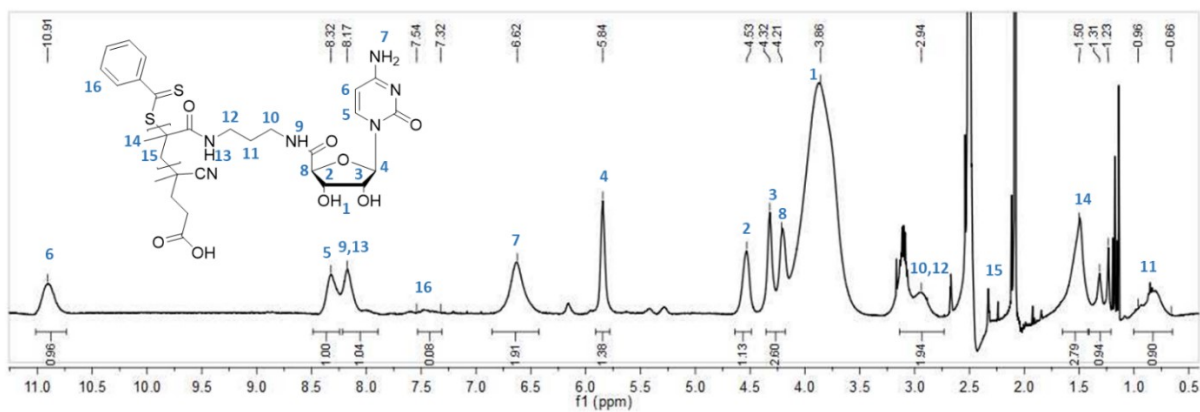

Figure 12.  $^1\text{H}$  NMR spectrum of deprotected homopolymer pCPMA **7** in  $\text{DMSO-d}_6$ .

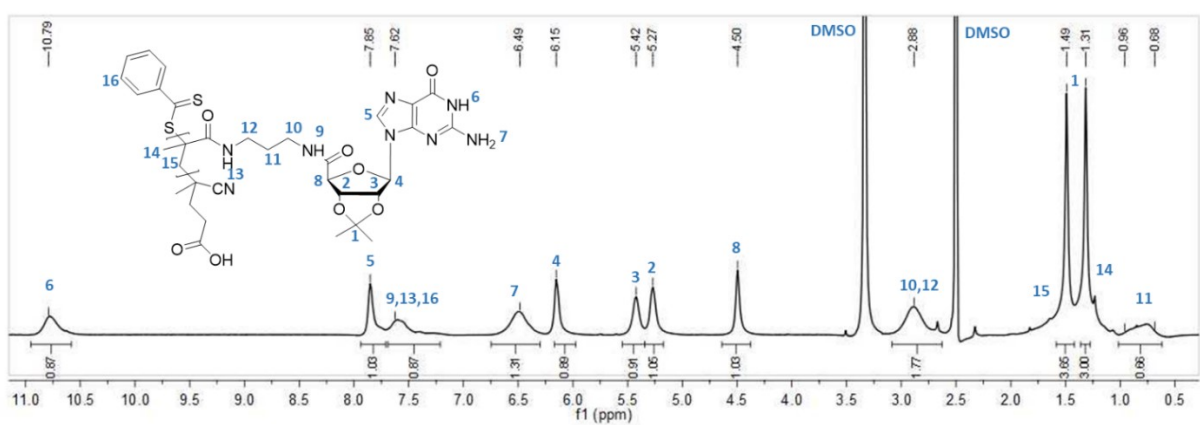

Figure 13.  $^1\text{H}$  NMR spectrum of homopolymer piGMA **6** in  $\text{DMSO-d}_6$ .

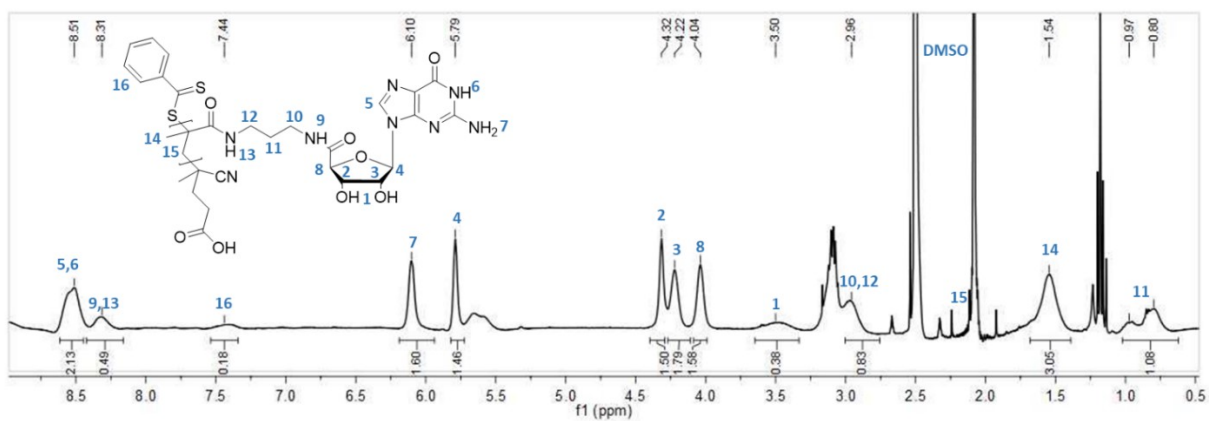

Figure 14.  $^1\text{H}$  NMR spectrum of deprotected homopolymer pGMA **8** in  $\text{DMSO-d}_6$ .



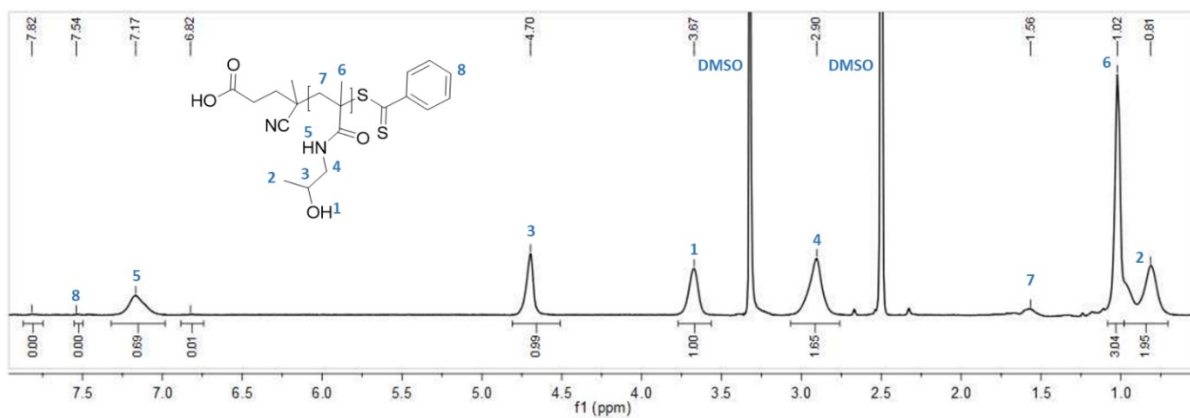

Figure 15.  $^1\text{H}$  NMR spectrum of pHPMA **9** in  $\text{DMSO-d}_6$ .

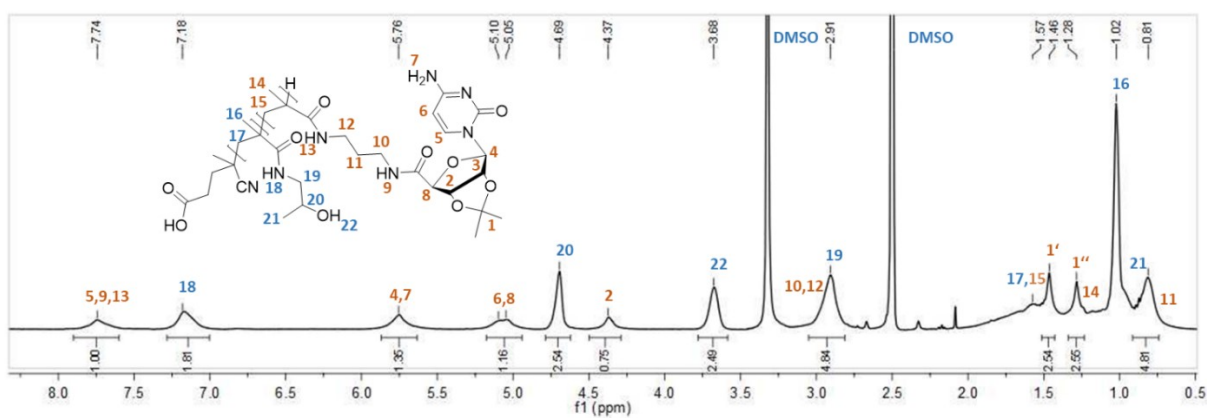

Figure 16.  $^1\text{H}$  NMR spectrum of blockcopolymer pHPMA-b-piCPMA **11** in  $\text{DMSO-d}_6$ .

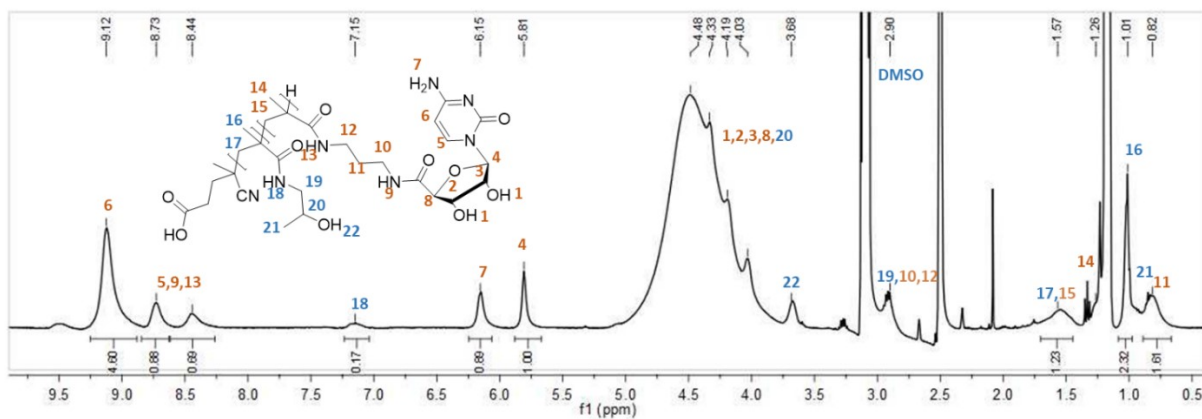

Figure 17.  $^1\text{H}$  NMR spectrum of deprotected blockcopolymer pHPMA-b-CPMA **13** in  $\text{DMSO-d}_6$ .

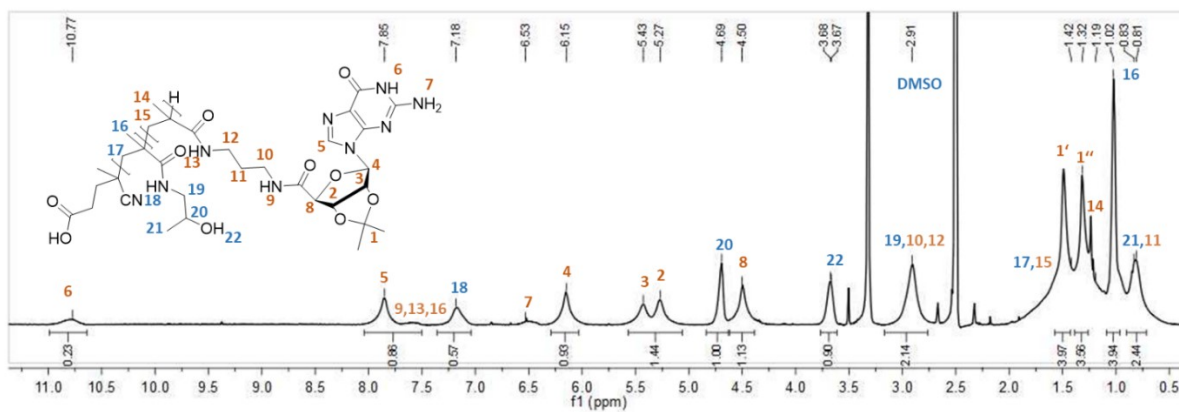

**Figure 18.** <sup>1</sup>H NMR of blockcopolymer pHPMA-*b*-piGPMa **12** in DMSO-*d*<sub>6</sub>.

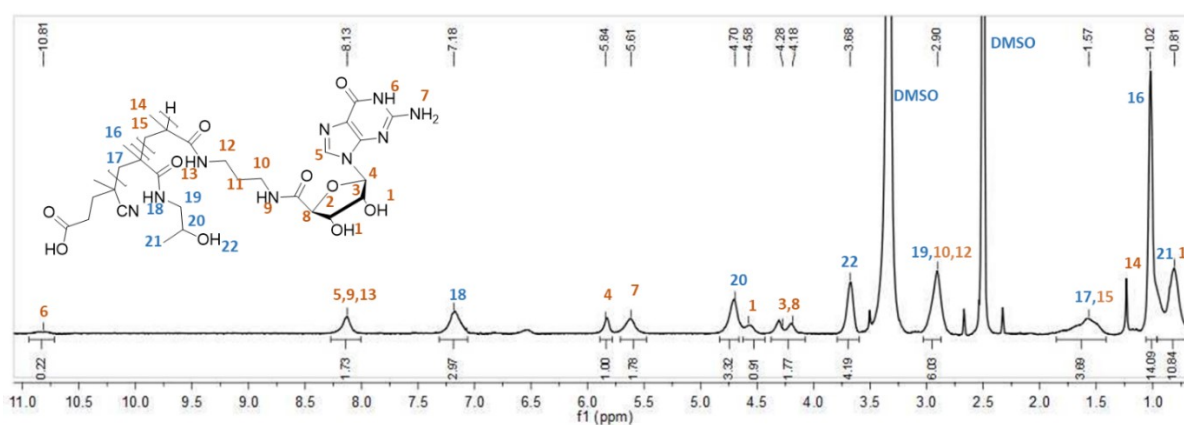

**Figure 19.** <sup>1</sup>H NMR spectrum of deprotected blockcopolymer pHPMA-*b*-pGPMa **14** in DMSO-*d*<sub>6</sub>.

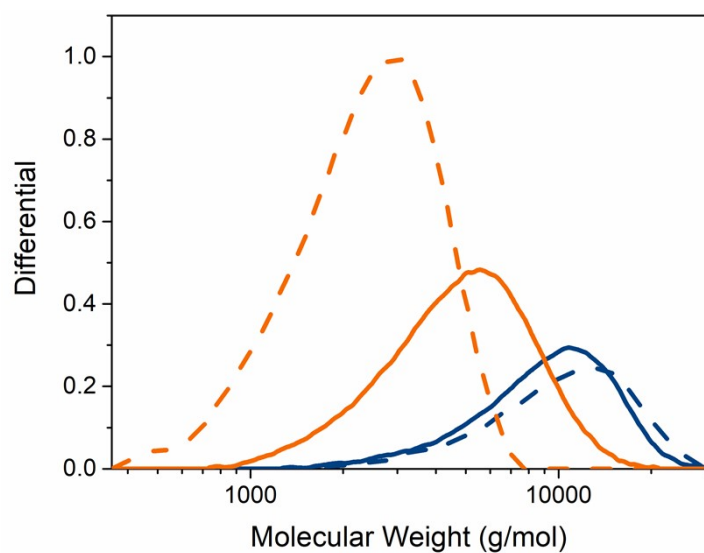

**Figure 20.** SEC analysis of piCpMA **5** (orange) and piGPMa **6** (blue) synthesized in DMF/H<sub>2</sub>O (straight) or 1,4-dioxane/H<sub>2</sub>O (dashed), respectively.

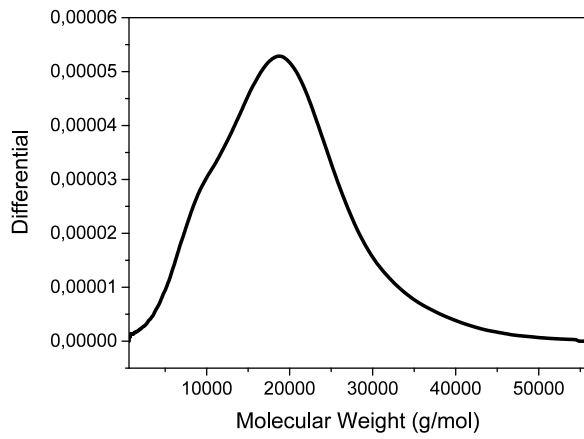

**Figure 21.** SEC analysis of pHPMA 9.

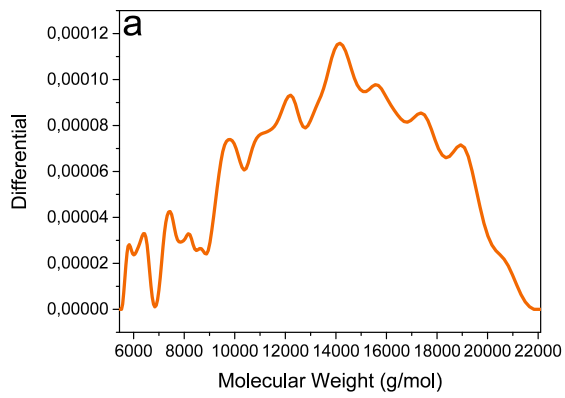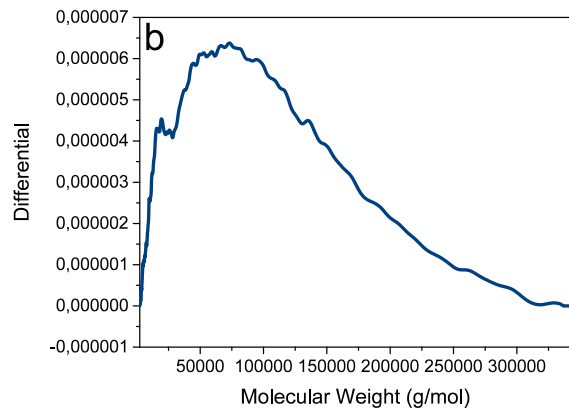

**Figure 22.** SEC analysis of a) pHPMA-*b*-piCPMA 11 and b) pHPMA-*b*-piGPMA 12.

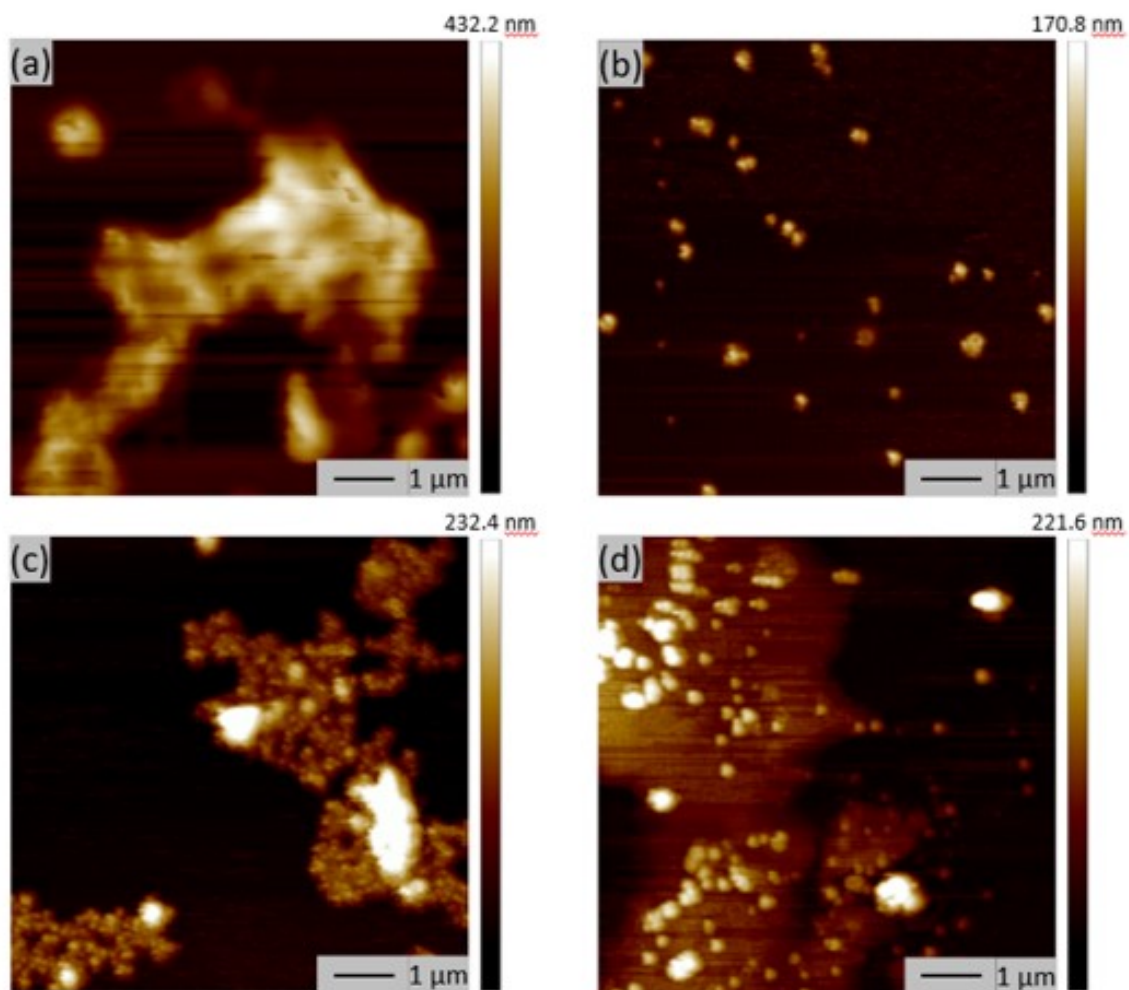

**Figure 23.** AFM images of (a) pHPMA-b-pCPMA **13**, (b) pHPMA-b-pGPMA **14**, (c) mixture of **13** and **14** before heating and (d) mixture of **13** and **14** after heating.
